# Supplementary material
Source: Copernicus journal article supplement (doi:10.5194/egusphere-2026-1203)
Supplement: Supplementary file 1 [file egusphere-2026-1203-supplement.pdf]

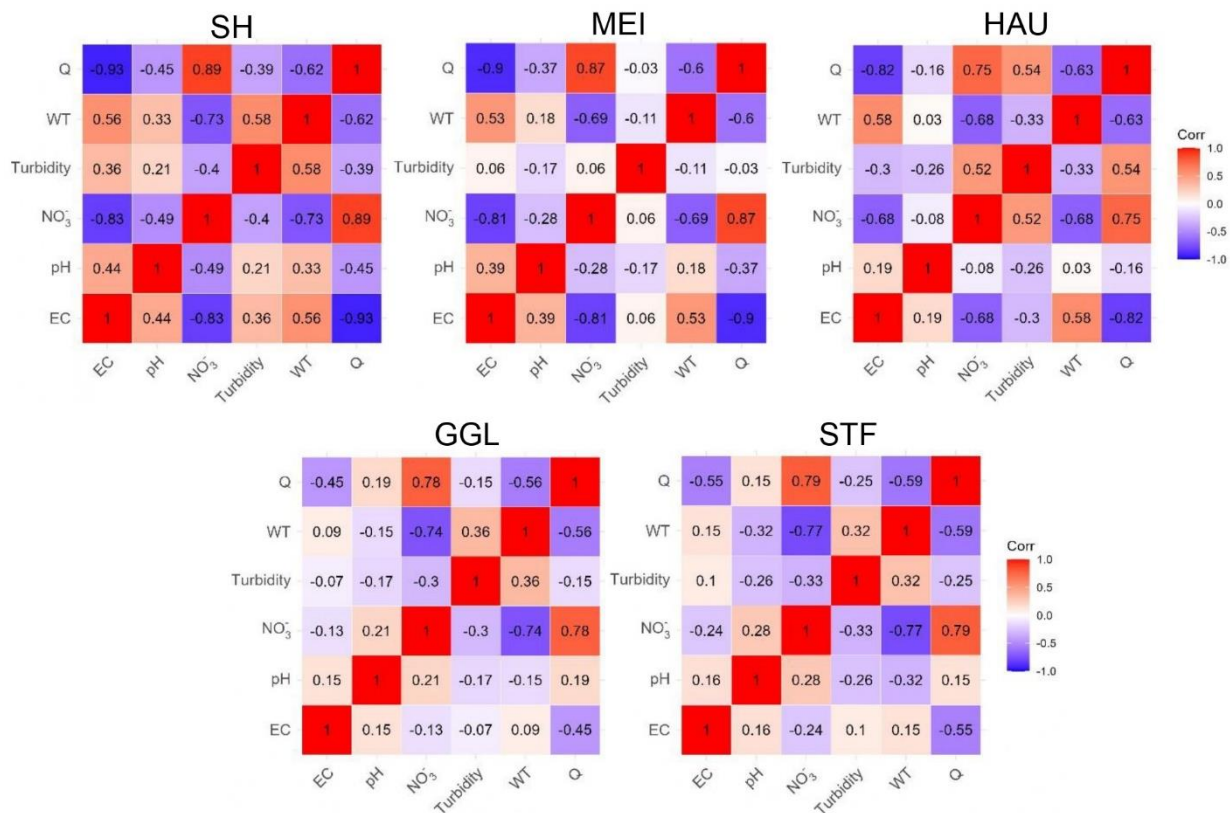

Figure S1: Spearman's correlation coefficient for water quality variables by monitoring station.

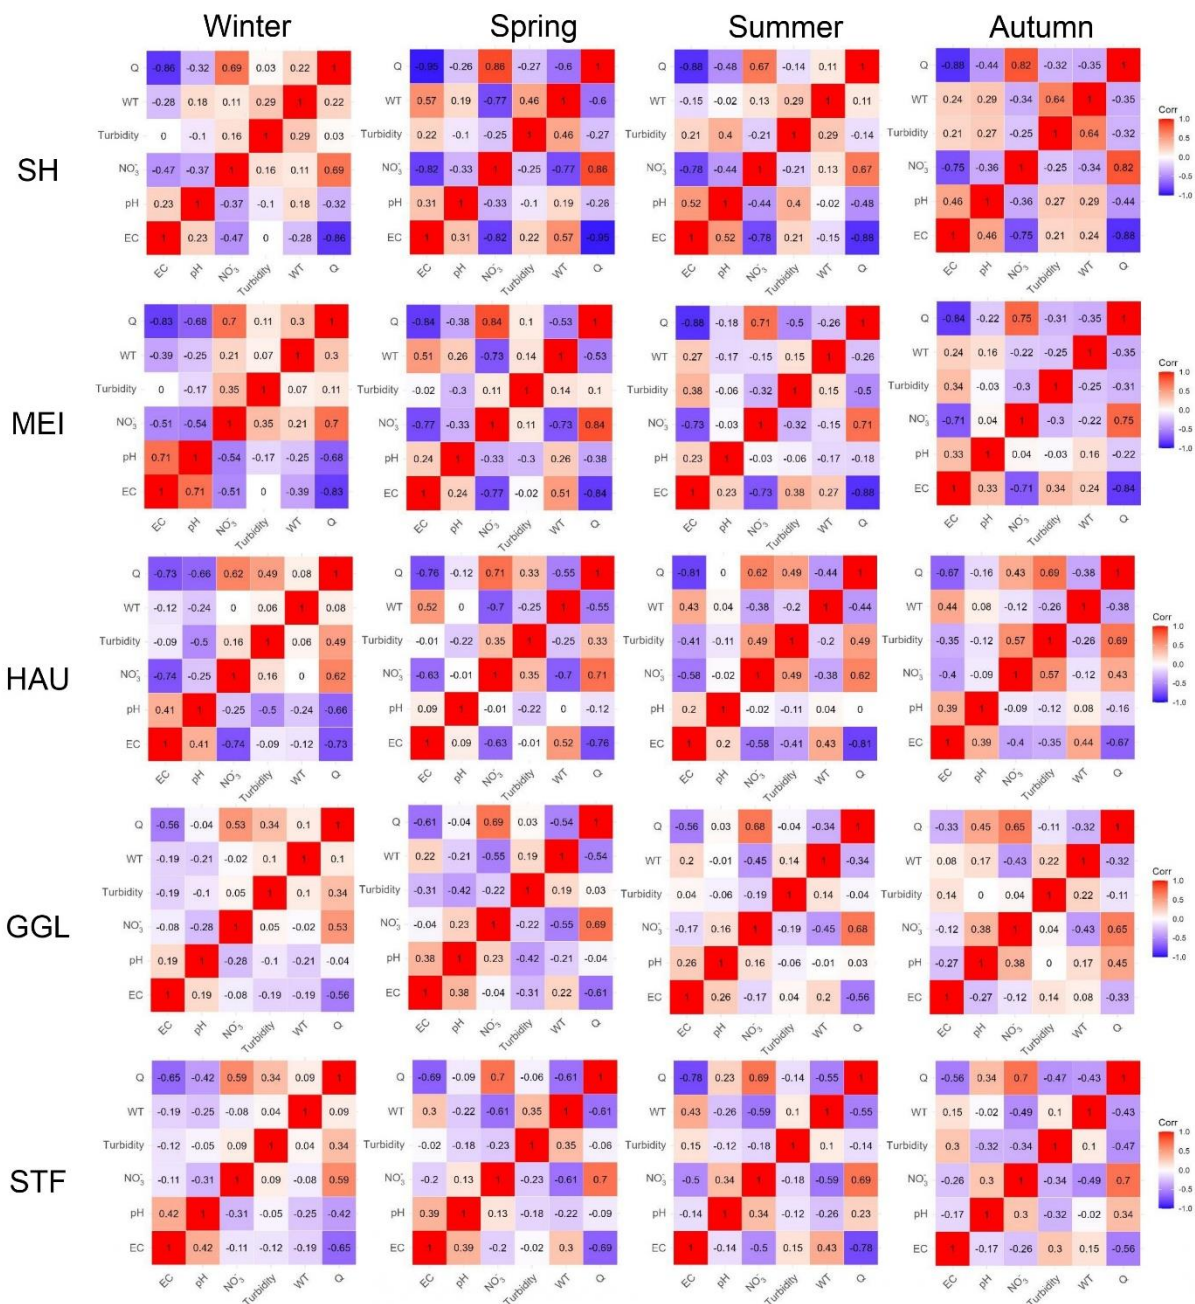

Figure S2: Spearman's correlation coefficient for water quality variables by season and time of year.

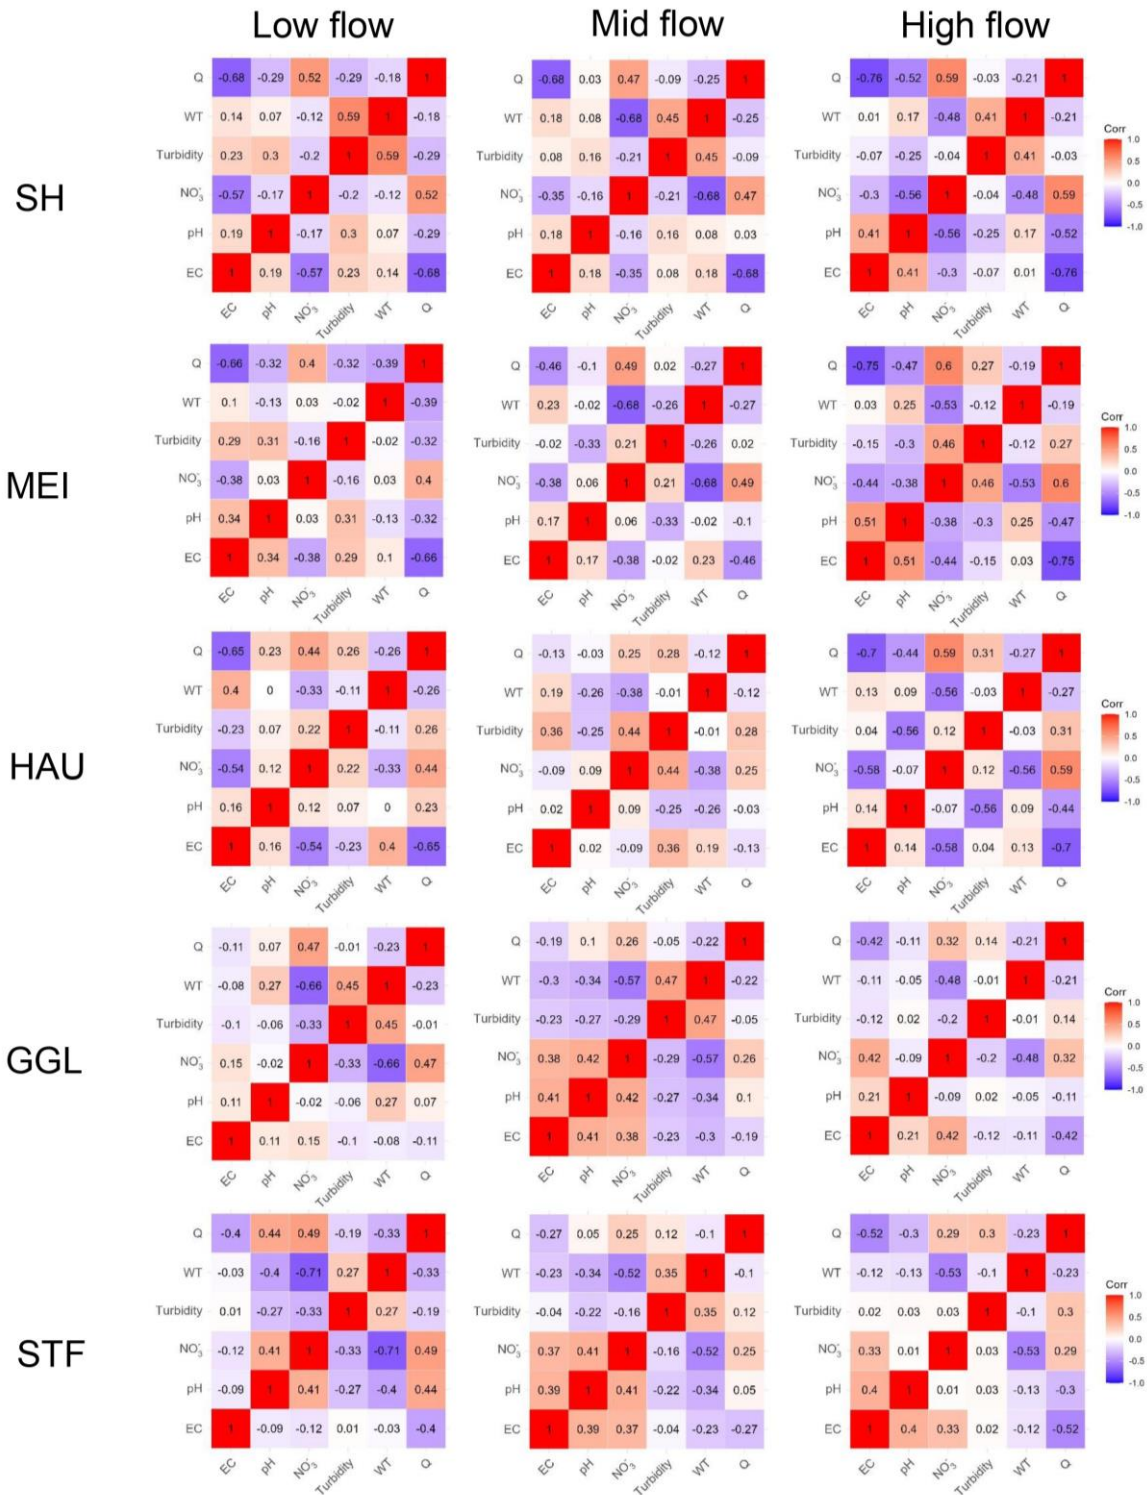

Figure S3: Spearman's correlation coefficient for water quality variables by season and flow regime.

**Table S1. Summary statistics of water quality parameters for the five monitoring sites from November 2013 to December 2019.**

| <b>Site</b> | <b>Variable</b>                               | <b>Mean</b> | <b>Minimum</b> | <b>Maximum</b> |
|-------------|-----------------------------------------------|-------------|----------------|----------------|
| <b>SH</b>   | Discharge (Q. m <sup>3</sup> /s)              | 0.67        | 0.05           | 13.7           |
|             | Water Temp. (°C)                              | 8.54        | -0.06          | 18.7           |
|             | Turbidity (FNU)                               | 4.47        | 0.105          | 153            |
|             | Nitrate (NO <sub>3</sub> <sup>-</sup> . mg/L) | 1.56        | 0.0000376      | 6.4            |
|             | pH                                            | 7.98        | 7.02           | 9.7            |
|             | EC (µS/cm)                                    | 342         | 190            | 522            |
| <b>MEI</b>  | Discharge (Q. m <sup>3</sup> /s)              | 0.997       | 0.0836         | 15.3           |
|             | Water Temp. (°C)                              | 8.79        | -0.18          | 21.2           |
|             | Turbidity (FNU)                               | 13.6        | 0.13           | 230            |
|             | Nitrate (NO <sub>3</sub> <sup>-</sup> . mg/L) | 1.57        | 0.00138        | 7              |
|             | pH                                            | 7.88        | 7.22           | 9.09           |
|             | EC (µS/cm)                                    | 399         | 220            | 589            |
| <b>HAU</b>  | Discharge (Q. m <sup>3</sup> /s)              | 1.33        | 0.012          | 15.1           |
|             | Water Temp. (°C)                              | 10.5        | -0.0967        | 26.1           |
|             | Turbidity (FNU)                               | 4.54        | 0.0312         | 179            |
|             | Nitrate (NO <sub>3</sub> <sup>-</sup> . mg/L) | 2.27        | 0.303          | 6.27           |
|             | pH                                            | 8.06        | 7.1            | 9.14           |
|             | EC (µS/cm)                                    | 1164        | 268            | 3075           |
| <b>GGL</b>  | Discharge (Q. m <sup>3</sup> /s)              | 8.95        | 1.55           | 52.3           |
|             | Water Temp. (°C)                              | 10.8        | -0.485         | 24.8           |
|             | Turbidity (FNU)                               | 16          | 0.0905         | 195            |
|             | Nitrate (NO <sub>3</sub> <sup>-</sup> . mg/L) | 2.42        | 0.569          | 4.79           |
|             | pH                                            | 7.99        | 7.26           | 8.7            |
|             | EC (µS/cm)                                    | 1079        | 401            | 1527           |
| <b>STF</b>  | Discharge (Q. m <sup>3</sup> /s)              | 9.17        | 1.65           | 49.5           |
|             | Water Temp. (°C)                              | 11.8        | -0.0362        | 30.1           |
|             | Turbidity (FNU)                               | 11.9        | 0.0781         | 206            |
|             | Nitrate (NO <sub>3</sub> <sup>-</sup> . mg/L) | 2.46        | 0.57           | 5.16           |
|             | pH                                            | 8.09        | 7.21           | 8.74           |
|             | EC (µS/cm)                                    | 1504        | 314            | 3571           |
